# Supplementary material
Source: publisher figshare collection journal article supplement (https://karger.figshare.com/ndownloader/files/12820211)
Supplement: Supplementary file 1 [file 12820211]

## **Predictive value of Thompson score for long-term neurological and cognitive outcome in term newborns with perinatal asphyxia and hypoxic-ischemic encephalopathy undergoing controlled hypothermia treatment**

Mendler MR, Mendler I, Hassan MA, Mayer B, Bode H and Hummler HD

Definition of different categories of neurological outcomes:

A **normal** neurological outcome was defined (all criteria to be met):

- normal neurological examination
- no hearing impairment
- no visual impairment

An outcome with a **mild** neurological impairment was defined (at least 1 criterion to be fulfilled):

- GMFCS Level 1 (e.g. is able to run alone, but may have gait disturbances)
- mild impairments on one or both eyes with normal or almost normal visual acuity
- mild fine and / or gross motor impairments
- language: dyslalia, dysgrammatism, restricted vocabulary

An outcome with an **moderate** neurological impairment was defined (at least 1 criterion to be fulfilled):

- GMFCS Level 2 or 3 (e.g. walks with limitations or using a hand-held mobility device)
- significantly impaired vision or hearing

An outcome with a **severe** neurological impairment was defined (at least 1 criterion to be fulfilled):

- GMFCS Level 4 or 5 (e.g. requires support during sitting or is strongly restricted in mobility)
- no useful vision or blindness / using hearing aids
- language: only single noises
